# Supplementary material
Source: MDPI journal article supplement (https://www.mdpi.com/2311-7524/8/4/296)
Supplement: s1 [file s1]

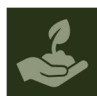

# Influence of Different Defoliation Timings on Quality and Phenolic Composition of the Wines Produced from the Serbian Autochthonous Variety Prokupac (*Vitis vinifera* L.)

Dušica Ćirković <sup>1</sup> Saša Matijašević <sup>2</sup>, Bratislav Ćirković <sup>3</sup>, Darko Laketić <sup>4</sup>, Zoran Jovanović <sup>3</sup>, Boban Kostić <sup>5</sup>, Zoran Bešlić <sup>2</sup>, Milica Sredojević <sup>6</sup>, Živoslav Tešić <sup>7</sup>, Tijana Banjanac <sup>8</sup>, and Uroš Gašić <sup>8,\*</sup>

<sup>1</sup> Department of Agricultural and Food Studies, Academy of Vocational Studies Southern Serbia, 18400 Prokuplje, Serbia; dusicacirkovic26@gmail.com

<sup>2</sup> Faculty of Agriculture, University of Belgrade, Nemanjina 6, 11080 Belgrade, Serbia; sasam@agrif.bg.ac.rs (S.M.); zbeslic@agrif.bg.ac.rs (Z.B.)

<sup>3</sup> Faculty of Agriculture, University of Priština, Kopaonička bb, 38219 Kosovska Mitrovica, Serbia; bratislav.cirkovic@pr.ac.rs (B.Ć.); zoran.jovanovic.polj@pr.ac.rs (Z.J.)

<sup>4</sup> Faculty of Medicine, University of Belgrade, Dr Subotića 8, 11000 Belgrade, Serbia; darko.laketic@med.bg.ac.rs

<sup>5</sup> Government of Agriculturae, Forestry and Water Management, Omladinskih Brigada 1, 11070 Belgrade, Serbia; bobankosticbk@gmail.com

<sup>6</sup> Innovation Center of the Faculty of Chemistry, University of Belgrade, 11158 Belgrade, Serbia; pantelism@chem.bg.ac.rs

<sup>7</sup> Faculty of Chemistry, University of Belgrade, 11158 Belgrade, Serbia; ztesic@chem.bg.ac.rs

<sup>8</sup> Department of Plant Physiology, Institute for Biological Research Siniša Stanković-National Institute of Serbia, University of Belgrade, Bulevar Despota Stefana 142, 11060 Belgrade, Serbia; tbanjanac@ibiss.bg.ac.rs

\* Correspondence: uros.gasic@ibiss.bg.ac.rs; Tel.: +381-11-2078385

**Table S1.** Content of individual polyphenols (mg/kg of grape seeds and skins, mg/L of wines), total phenolic contents (TPC, g GAE/kg of grape seeds and skins, g GAE/L of wines) and radical scavenging activity (RSA, mmol TE/kg of grape seeds and skins, mmol TE/L of wines).

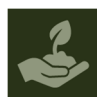

Table S1

| No | Variables used in PCA              | wines   |        |         |          | seeds   |         |         |          | skins   |        |         |          |
|----|------------------------------------|---------|--------|---------|----------|---------|---------|---------|----------|---------|--------|---------|----------|
|    |                                    | control | var. I | var. II | var. III | control | var. I  | var. II | var. III | control | var. I | var. II | var. III |
| 1  | gallic acid                        | 10.63   | 8.87   | 9.46    | 11.13    | 258.64  | 199.14  | 226.84  | 165.13   | 0.15    | 2.00   | --      | 0.10     |
| 2  | protocatechuic acid                | 0.60    | 0.90   | 1.08    | 0.99     | 0.81    | 0.38    | 0.47    | 0.58     | 0.26    | --     | 0.03    | --       |
| 3  | <i>p</i> -hydroxyphenylacetic acid | 2.00    | --     | --      | 0.38     | 6.93    | 1.83    | 2.00    | 11.83    | --      | --     | --      | --       |
| 4  | gentisic acid                      | 0.15    | 0.16   | 0.21    | 0.22     | --      | 0.14    | --      | 0.16     | 0.21    | 0.19   | --      | --       |
| 5  | ellagic acid                       | 3.90    | 2.33   | 2.95    | 3.59     | 618.70  | 542.27  | 520.10  | 613.38   | 2.66    | 1.37   | 1.45    | 1.03     |
| 6  | vanillic acid                      | --      | 0.11   | --      | 0.18     | --      | --      | --      | 0.90     | --      | --     | --      | --       |
| 7  | caffeic acid                       | 0.94    | 0.79   | 0.83    | 0.97     | --      | 0.95    | --      | --       | 0.28    | 0.19   | 0.07    | 0.12     |
| 8  | <i>p</i> -coumaric acid            | 0.33    | 0.21   | 0.34    | 0.39     | --      | --      | --      | --       | --      | --     | --      | --       |
| 9  | ferulic acid                       | --      | 0.42   | --      | --       | --      | --      | --      | --       | --      | --     | --      | --       |
| 10 | sinapic acid                       | 0.11    | --     | --      | 0.72     | --      | --      | --      | --       | --      | --     | --      | --       |
| 11 | catechin                           | 8.17    | 8.53   | 7.87    | 7.87     | 959.06  | 1215.53 | 1605.08 | 881.94   | 12.78   | 14.12  | 15.38   | 11.38    |
| 12 | gallo catechin gallate             | 0.18    | 0.27   | 0.37    | 0.13     | 5.61    | 5.06    | 4.91    | 8.37     | 0.54    | 0.63   | 0.57    | 1.53     |
| 13 | epigallocatechin gallate           | 0.15    | 0.34   | 0.17    | 0.34     | --      | --      | --      | --       | 0.13    | 0.36   | 0.15    | 0.00     |
| 14 | kaempferol-3-O-glucoside           | --      | 0.01   | --      | --       | --      | --      | --      | --       | 1.62    | 4.06   | 2.45    | 3.76     |
| 15 | quercetin-3-O-galactoside          | 0.32    | 1.27   | 1.29    | 1.06     | 0.31    | 0.33    | 0.64    | 0.44     | 32.93   | 73.92  | 56.39   | 68.36    |
| 16 | rutin                              | 0.01    | 0.01   | 0.02    | 0.01     | --      | --      | --      | --       | 3.86    | 13.89  | 5.44    | 5.83     |
| 17 | naringenin                         | 0.00    | 0.01   | 0.02    | 0.02     | 0.09    | --      | --      | 0.20     | 0.08    | 0.17   | --      | 0.08     |
| 18 | hesperetin                         | --      | --     | --      | 0.01     | 0.12    | 0.13    | 0.08    | --       | 3.41    | 4.71   | 2.38    | 3.15     |
| 19 | luteolin-7-O-glucoside             | 0.03    | 0.18   | 0.09    | 0.12     | 0.29    | 0.29    | 0.33    | 0.16     | 25.45   | 65.52  | 42.64   | 62.27    |
| 20 | phlorizin                          | 0.36    | 0.33   | 0.38    | 0.37     | 9.79    | 9.02    | 12.79   | 7.62     | 0.68    | 0.17   | 0.12    | 0.24     |
| 21 | TPC                                | 0.86    | 0.87   | 0.96    | 0.97     | 75.59   | 65.64   | 82.31   | 66.26    | 12.74   | 16.91  | 13.24   | 14.53    |
| 22 | RSA                                | 5.32    | 5.43   | 6.06    | 6.00     | 530.28  | 495.53  | 534.68  | 493.71   | 78.86   | 100.51 | 82.07   | 92.06    |
